# Supplementary material
Source: publisher site journal article supplement (https://www.dovepress.com/article/288952)
Supplement: Supplementary file 1 [file get_supplementary_file.php]

Supplementary table 1 Results of skin prick test for seasonal pollens.

| Seasonal pollen | Positivity, n (%) |
| --- | --- |
| *Sabina chinensis* | 10 (16.7%) |
| *Populus* | 12 (20.0%) |
| *Salix* | 19 (31.7%) |
| *Sophora japonica* | 11 (18.3%) |
| *Betula* | 18 (30.0%) |
| *Firmiana platanifolia* | 12 (20.0%) |
| *Fraxinus pennsylvanica Marsh* | 13 (21.7%) |
| *Ulmus pumila* | 14 (23.3%) |
| *Ambrosia artemisiifolia* | 24 (40.0%) |
| *Humulus scandens* | 21 (35.0%) |
| *Chenopodium album* | 23 (38.3%) |
| *Artemisia sieversiana* | 52 (86.7%) |
| *Zea mays* | 19 (31.7%) |
| *Helianthus annuus* | 24 (40.0%) |
| *Ginkgo biloba* | 12 (20.0%) |
| *Brassica campestris* | 12 (20.0%) |
